# Supplementary material for: N 6 -methyl-adenosine level in Nicotiana tabacum is associated with tobacco mosaic virus
Source: Springer Nature journal article supplement (doi:10.1186/s12985-018-0997-4), 2018-05-16
Supplement: MOESM1 [file 15769728]

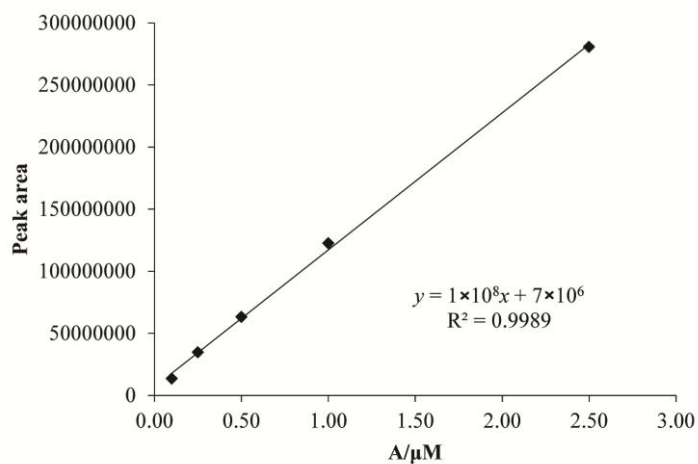

**Figure S1.** Calibration curves for the quantifications of A in mRNA. The amounts of A ranged 0.1 – 2.5 μmol.

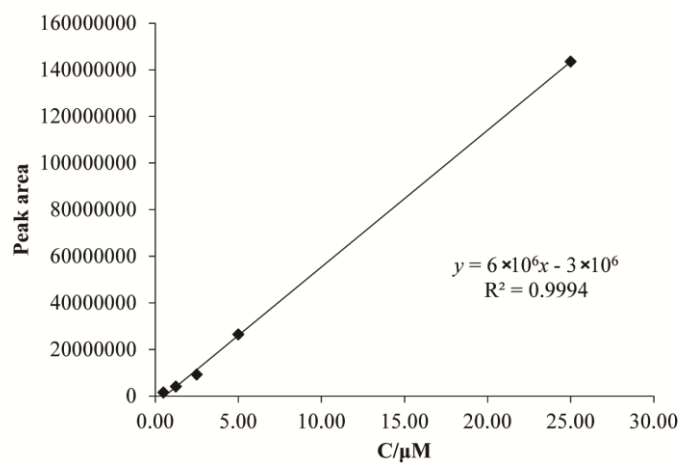

**Figure S2.** Calibration curves for the quantifications of C in mRNA. The amounts of C ranged 0.5 – 25 μmol.

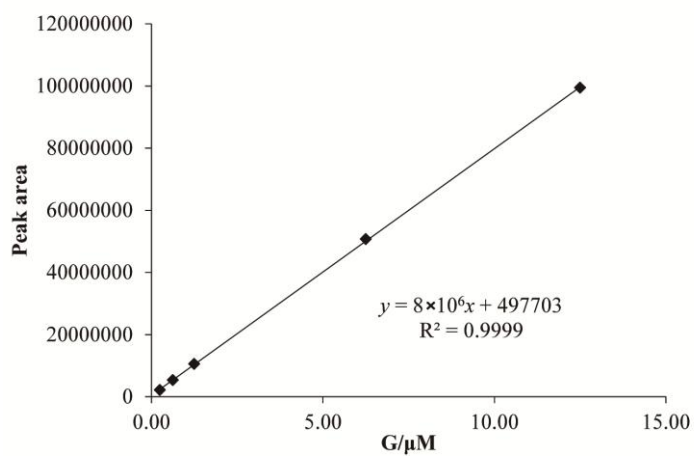

**Figure S3.** Calibration curves for the quantifications of G in mRNA. The amounts of G ranged 0.25 – 12.5 μmol.

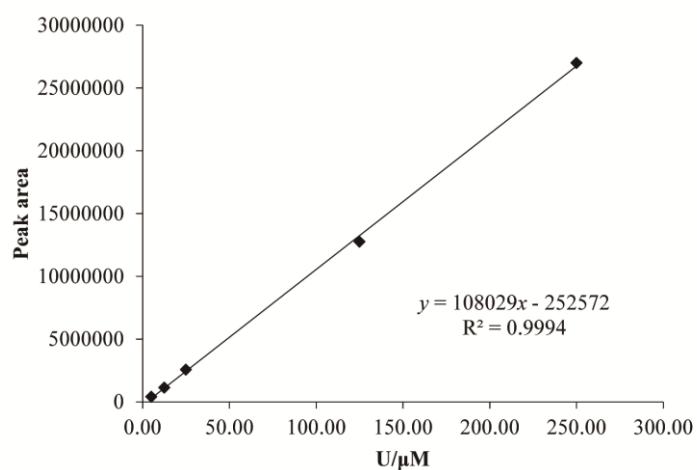

**Figure S4.** Calibration curves for the quantifications of U in mRNA. The amounts of U ranged 5 – 250 μmol.

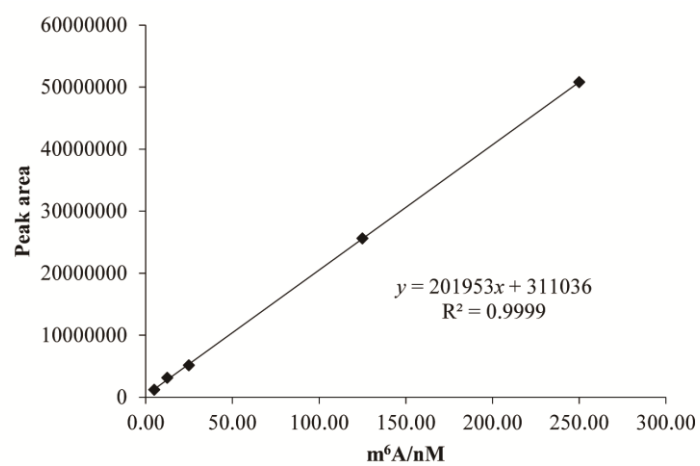

**Figure S5.** Calibration curves for the quantifications of m<sup>6</sup>A in mRNA. The amounts of m<sup>6</sup>A ranged 0.005 – 0.250 μmol.

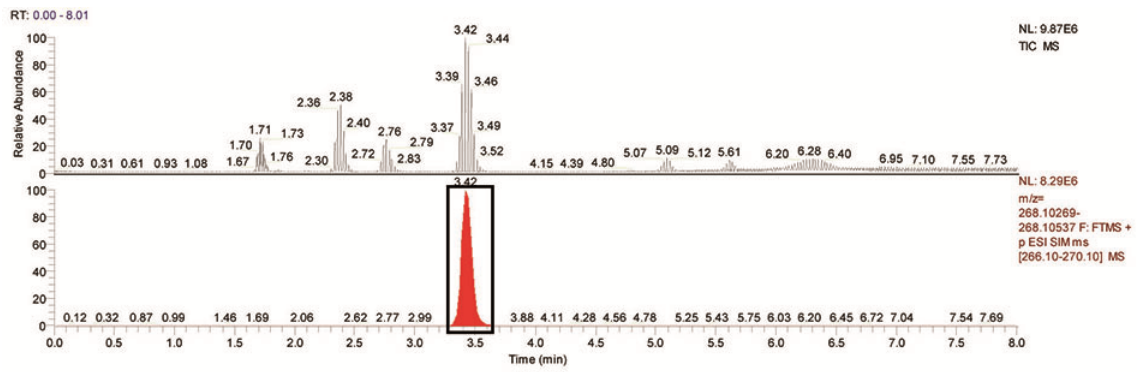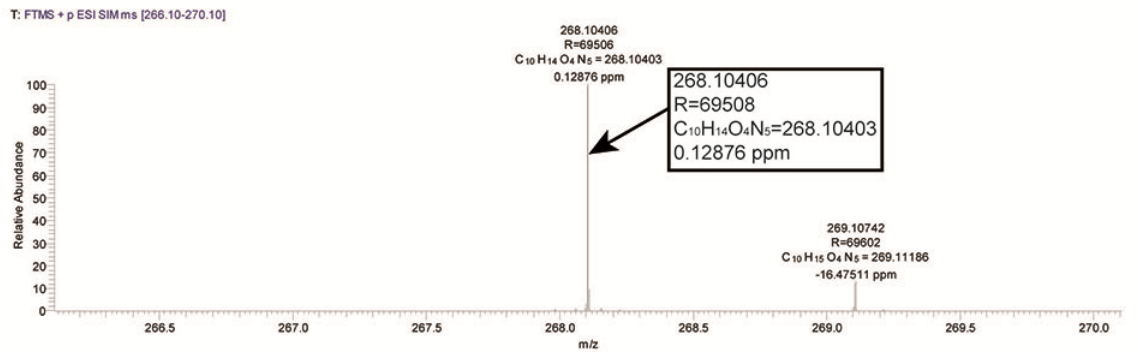

**Figure S6.** Representative UHPLC-HR-MS/MS results for the quantifications of A in *N. tabacum* K-326 with selected-ion chromatograms.

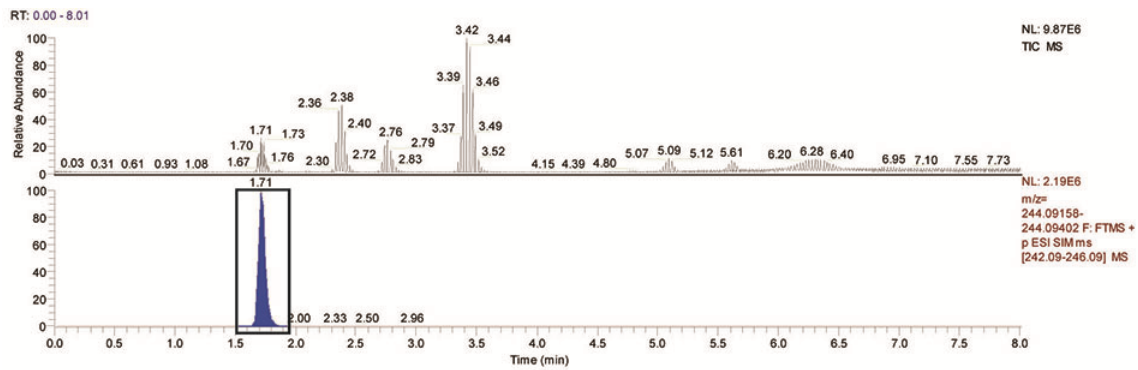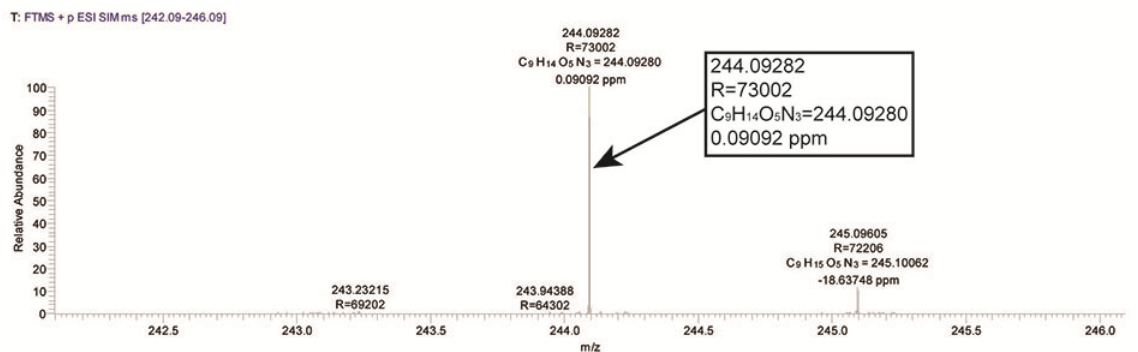

**Figure S7.** Representative UHPLC-HR-MS/MS results for the quantifications of C in *N. tabacum* K-326 with selected-ion chromatograms.

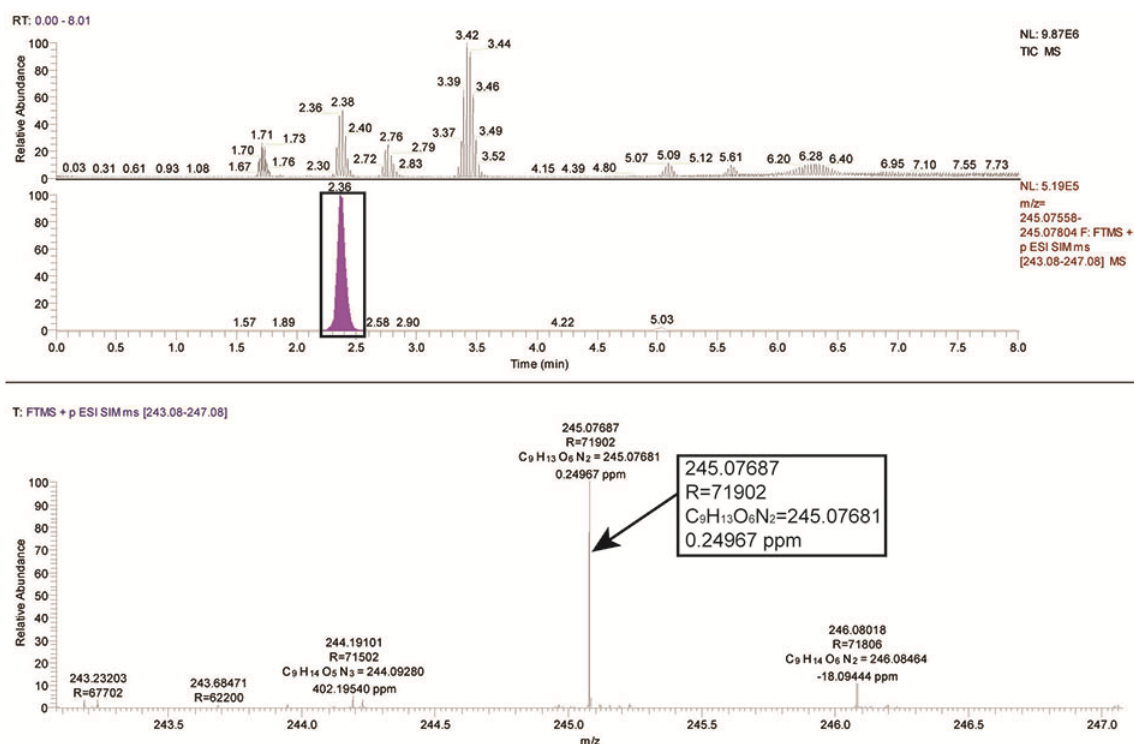

**Figure S8.** Representative UHPLC-HR-MS/MS results for the quantifications of U in *N. tabacum* K-326 with selected-ion chromatograms.

**Table S1.** Primer sequences for RT-qPCR analysis

| Gene name      | Primer sequences (5'-3')                              | Amplicon length (bp) |
|----------------|-------------------------------------------------------|----------------------|
| XM_009766347   | F: ACGCTCATTTTGCTTCCAGT<br>R: ATCCCCTTCCCAGTCGTCAT    | 171                  |
| XM_009766348   | F: TTGGCCGTAGAAGGCTTGAG<br>R: GTGTAGGCCTGAACTCAGCA    | 114                  |
| XM_009775897   | F: GGCAAACGGAAGATGAAGCC<br>R: CTGGTGCTGGTGTGATGGAT    | 172                  |
| XM_009770927   | F: TAGGCCGACACGTACTIONGAGA<br>R: CGGCGGCATATTGAAACAGG | 163                  |
| XM_009801708   | F: AGGTTTATGTCCCCACTGCG<br>R: TCTGCAGAACTTTTGTGACATT  | 114                  |
| XM_009801663   | F: GTTCCGCCACTTTTGTGCGAG<br>R: AGATGGCACCTCTGGGCATA   | 148                  |
| $\beta$ -actin | F: GACATGAAGGAGGAGCTTGC<br>R: ATCATGGATGGCTGGAAGAG    | 178                  |

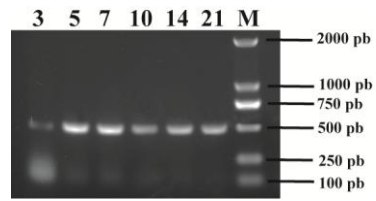

**Figure S9.** TMV detection by the PCR method. M: DL2000 maker, Lanes 3, 5, 7, 10, 14 and 21: The TMV coat protein gene in *N. tabacum* K326 at 3, 5, 7, 10, 14 and 21 days post infection TMV.
